# Supplementary material for: Differences in Antioxidant Potential of Allium cepa Husk of Red, Yellow, and White Varieties
Source: MDPI journal article supplement (doi:10.3390/antiox11071243), 2022-06-24
Supplement: s1 [file s1]

**Table S1.** The mass parameters and identification characteristics of all manually selected compounds

| Metabolite name                                                  | Adduct type | Ontology                                   | Total score |
|------------------------------------------------------------------|-------------|--------------------------------------------|-------------|
| 3,4-Dihydroxybenzoic acid                                        | [M-H]-      | Hydroxybenzoic acid derivatives            | 92          |
| Vanillic acid                                                    | [M-H]-      | M-methoxybenzoic acids and derivatives     | 90          |
| Gallic acid                                                      | [M-H]-      | Gallic acids                               | 88.5        |
| Benzoic acid 2O, O-Hex; PlaSMA ID-666                            | [M-H]-      | Phenolic glycosides                        | 93.1        |
| w/o MS2:Lecanoric Acid                                           | [M-H]-      | Depsides and depsidones                    | 97.7        |
| w/o MS2:Feruloyl quinic acid (isomer of 886, 887); PlaSMA ID-888 | [M-H]-      | Quinic acid and derivatives                | 96.1        |
| Citric acid                                                      | [M-H]-      | Tricarboxylic acids and derivatives        | 92.4        |
| 5-Ketogluconic acid                                              | [M-H]-      | Medium-chain hydroxy acids and derivatives | 82          |
| w/o MS2:Gluconic acid                                            | [M-H]-      | Medium-chain hydroxy acids and derivatives | 99.8        |
| w/o MS2:Lipoic acid                                              | [M-H]-      | Lipoic acids and derivatives               | 99.9        |
| Bergapten                                                        | [M2H]-      | 5-methoxypsoralens                         | 70.2        |
| Dihydrochalcone                                                  | [M-H]-      |                                            | 73.3        |
| w/o MS2:Oxazepam; LC-ESI-ITFT; MS2; CE                           | [M-H]-      | 1,4-benzodiazepines                        | 73.9        |
| w/o MS2:Lorazepam                                                | [M-H]-      | 1,4-benzodiazepines                        | 81          |
| Tectorigenin                                                     | [M-H]-      | Isoflavones                                | 88.9        |
| Quercetin                                                        | [M-H]-      | Flavonols                                  | 91.6        |
| w/o MS2:Taxifolin                                                | [M-H]-      | Flavanonols                                | 85.3        |
| Isoquercetrin                                                    | [M-H]-      | Flavonoid-3-O-glycosides                   | 94.3        |
| Spiraeoside                                                      | [M-H]-      | Flavonoid O-glycosides                     | 90          |
| 3'-methoxy-4',5,7-trihydroxyflavonol                             | [M-H]-      | Flavonols                                  | 85.7        |
| w/o MS2:Myricetin                                                | [M-H]-      | Flavonols                                  | 98.7        |
| Quercetin-3,4'-O-di-beta-glucoside                               | [M-H]-      | Flavonoid-3-O-glycosides                   | 84.9        |
| Hyperoside; LC-ESI-QTOF; MS2; CE                                 | [2M-H]-     | Flavonoid-3-O-glycosides                   | 81.8        |
| w/o MS2:Laricitrin                                               | [M-H]-      | Flavonols                                  | 98.4        |
| w/o MS2:5,7-dihydroxy-3,8-dimethoxy-2-phenyl-4H-chromen-4-one    | [M-H]-      | 8-O-methylated flavonoids                  | 93.3        |
| w/o MS2:Haematommone                                             | [M-H]-      | Hydroxyanthraquinones                      | 92.4        |
| w/o MS2:skimmin                                                  | [M-H2O-H]-  | Coumarin glycosides                        | 93.3        |
| hyperoside                                                       | [M-H]-      |                                            | 82.5        |
| w/o MS2:3-O-acetylpadmatin                                       | [M-H]-      | 7-O-methylated flavonoids                  | 96.9        |
| Isorhamnetin 3-galactoside                                       | [M-H]-      |                                            | 87.7        |
